# Supplementary material
Source: Research Square preprint supplement (doi:10.21203/rs.3.rs-8888690/v1)
Supplement: Supplementary file 1 [file 829190205feab40181a2ff4d.docx]

**Enhanced formula:**

**Variable Key**:

**A** = Al₂O₃, **S** = SiO₂, **F** = Fe₂O₃, **T** = TiO₂, **N** = Na₂O, **C** = CaO

ln() denotes natural logarithm

log() denotes base-10 logarithm

All k constants are defined in the coefficient mapping table below

| **k constant** | **Original Value** | **k constant** | **Original Value** | **k constant** | **Original Value** |
| --- | --- | --- | --- | --- | --- |
| k₁ | 41235.78 | k₂₆ | -35.49 | k₅₁ | -74148.66 |
| k₂ | 190821.53 | k₂₇ | -1.16 | k₅₂ | -49006.14 |
| k₃ | 82872.70 | k₂₈ | 36368.15 | k₅₃ | 43847.87 |
| k₄ | 129245.86 | k₂₉ | -4521.05 | k₅₄ | 135724.28 |
| k₅ | 56130.76 | k₃₀ | 258.46 | k₅₅ | 74148.66 |
| k₆ | 185663.30 | k₃₁ | 173538.86 | k₅₆ | -0.94 |
| k₇ | 80632.55 | k₃₂ | -21808.56 | k₅₇ | 1046.54 |
| k₈ | 141815.44 | k₃₃ | 47773.35 | k₅₈ | -84.74 |
| k₉ | 61589.66 | k₃₄ | -45559.80 | k₅₉ | 10490.88 |
| k₁₀ | 106029.27 | k₃₅ | 493164.67 | k₆₀ | -575.95 |
| k₁₁ | 46047.93 | k₃₆ | -7694.29 | k₆₁ | 98663.79 |
| k₁₂ | 55097.19 | k₃₇ | 3.61 | k₆₂ | -1381.27 |
| k₁₃ | 23928.40 | k₃₈ | 197870.00 | k₆₃ | 140130.48 |
| k₁₄ | -37.86 | k₃₉ | -23735.60 | k₆₄ | 239.74 |
| k₁₅ | 1.92 | k₄₀ | 862.49 | k₆₅ | -18298.90 |
| k₁₆ | -271866.76 | k₄₁ | 12195.86 | k₆₆ | 110.93 |
| k₁₇ | -355.73 | k₄₂ | 25.29 | k₆₇ | -11108.46 |
| k₁₈ | 6.99 | k₄₃ | -2482.38 | k₆₈ | 176336.75 |
| k₁₉ | -192259.46 | k₄₄ | -5158.26 | k₆₉ | 47773.35 |
| k₂₀ | 15.70 | k₄₅ | 61575.67 | k₇₀ | 12195.86 |
| k₂₁ | 0.38 | k₄₆ | 56417.36 | k₇₁ | -5158.26 |
| k₂₂ | -250128.00 | k₄₇ | -43847.86 | k₇₂ | 1108.87 |
| k₂₃ | -3737.58 | k₄₈ | 84792.21 | k₇₃ | 2213.54 |
| k₂₄ | 192.85 | k₄₉ | 79634.04 |  |  |
| k₂₅ | -226854.97 | k₅₀ | -61575.66 |  |  |
